# Supplementary material
Source: PubMed Central journal article supplement (PMC3719710)
Supplement: AAC.00659-13_zac999102027so1.pdf [file AAC.00659-13_zac999102027so1.pdf]

**Supplemental Table S1.** pH Stability of 100 mM Phosphate Buffer with TF-3 and 1% LA Following Adjustments of pH with NaOH

| Treatment                              | Initial<br>pH | Time |        |          |
|----------------------------------------|---------------|------|--------|----------|
|                                        |               | 0    | 1 hour | 24 hours |
| PBS, 1% LA                             | 4.0           | 4.06 | 4.04   | 4.02     |
| PBS, 1% LA, TF-3                       | 4.0           | 4.08 | 4.04   | 4.03     |
| 12.5% semen, PBS, 1% LA                | 4.0           | 4.40 | 4.32   | 4.33     |
| 12.5% semen, PBS, LA, TF-3             | 4.0           | 4.40 | 4.32   | 4.31     |
| 10% CVL, PBS, 1% LA                    | 4.0           | 4.05 | 4.00   | 4.01     |
| 10% CVL, PBS, 1% LA, TF-3              | 4.0           | 4.05 | 4.00   | 4.01     |
| 12.5% semen, 10% CVL, PBS, 1% LA       | 4.0           | 4.49 | 4.47   | 4.48     |
| 12.5% semen, 10% CVL, PBS, 1% LA, TF-3 | 4.0           | 4.42 | 4.41   | 4.42     |
| PBS + 1% LA                            | 4.5           | 4.62 | 4.68   | 4.67     |
| PBS + 1% LA +TF-3                      | 4.5           | 4.64 | 4.67   | 4.66     |
